# Supplementary material for: A thermally induced fluorescence enhancement strategy for efficient all-inorganic rubidium manganese halide
Source: Royal Society of Chemistry journal article supplement (doi:10.1039/d3qi00638g), 2023-01-01
Supplement: d3qi00638g1.pdf [file d3qi00638g1.pdf]

## Electronic Supplementary Information

### **A Thermally Induced Fluorescence Enhancement Strategy for Efficient All-Inorganic Rubidium Manganese Halides**

Huidong Tang,<sup>a</sup> Yanqiao Xu,<sup>\*, a, c</sup> Qing Hu,<sup>a</sup> Sanhai Wang,<sup>a</sup> Jian Liang,<sup>\*, a, c</sup> Lianjun Wang,<sup>\*, b, c</sup> and  
Wan Jiang<sup>b, c</sup>

a. School of Material Science and Engineering, Jingdezhen Ceramic University, Jingdezhen 333403,  
P. R. China.

E-mail: xuyanqiao@jcu.edu.cn

b. Engineering Research Center of Advanced Glasses Manufacturing Technology, Ministry of  
Education, Donghua University, Shanghai 201620, P. R. China.

E-mail: wanglj@dhu.edu.cn

c. Address here National Engineering Research Center for Domestic & Building Ceramics,  
Jingdezhen Ceramic University, Jingdezhen 333001, P. R. China.

E-mail: liangjian@jcu.edu.cn

**Table S1.** The lattice parameters of  $\text{Rb}_2\text{MnBr}_4 \cdot 2\text{H}_2\text{O}$ .

| Atom                                                                                                                         | Position | x           | y           | z           | Ueq(Å <sup>2</sup> ) | Occupancy |
|------------------------------------------------------------------------------------------------------------------------------|----------|-------------|-------------|-------------|----------------------|-----------|
| Rb1                                                                                                                          | 2i       | 0.24252(25) | 0.15534(16) | 0.12391(16) | 0.0342(3)            | 1         |
| Br1                                                                                                                          | 2i       | 0.75687(25) | 0.87839(16) | 0.38181(16) | 0.0408(3)            | 1         |
| Br2                                                                                                                          | 2i       | 0.26293(25) | 0.64119(16) | 0.16331(16) | 0.0515(0)            | 1         |
| O1                                                                                                                           | 2i       | 0.76503(25) | 0.36858(16) | 0.33953(16) | 0.0097(0)            | 1         |
| Mn1                                                                                                                          | 1g       | 0           | 0.50000     | 0.50000     | 0.3113(3)            | 1         |
| Space group: P-1 (No. 2), triclinic, Z=1, $\alpha=66.0032(7)^\circ$ , $\beta=87.7903(14)^\circ$ , $\gamma=84.8967(14)^\circ$ |          |             |             |             |                      |           |
| Cell parameters a= 5.8916(0) Å, b= 6.8800(1) Å, c= 7.3647(1) Å and V= 271.64(1) Å <sup>3</sup>                               |          |             |             |             |                      |           |
| Reliability factor: $R_{\text{wp}}=11.68\%$ , $R_p=8.36\%$ , $\chi^2=1.82$                                                   |          |             |             |             |                      |           |

**Table S2.** The EDS analysis of  $\text{Rb}_2\text{MnBr}_4 \cdot 2\text{H}_2\text{O}$  with different temperature treatment.

| Sample with different temperature treatment | Rb/(Atomic %) | Mn/(Atomic %) | Br/(Atomic %) | O/(Atomic %) |
|---------------------------------------------|---------------|---------------|---------------|--------------|
| 30 °C                                       | 26.02         | 8.70          | 40.68         | 24.59        |
| 160 °C                                      | 30.91         | 10.41         | 46.40         | 12.28        |

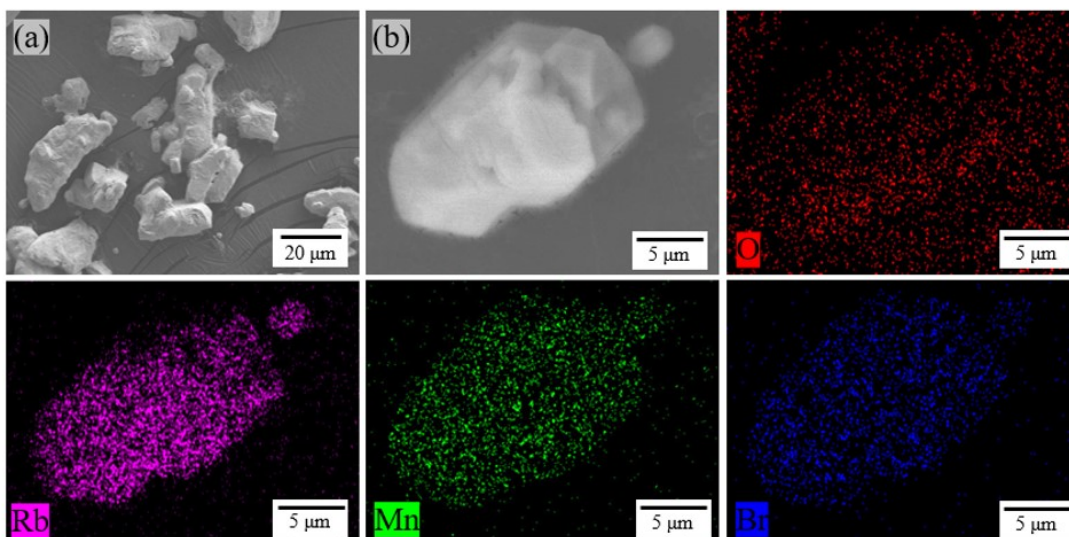

**Fig. S1** (a) SEM images and (b) EDS mapping of  $\text{Rb}_2\text{MnBr}_4 \cdot 2\text{H}_2\text{O}$ .

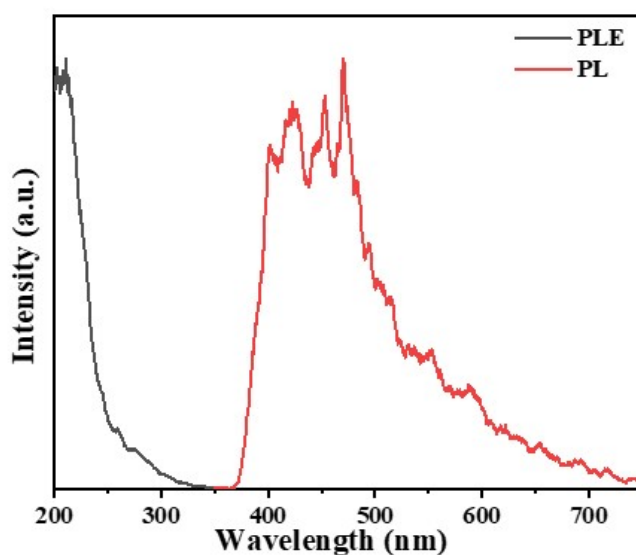

**Fig. S2** PLE and PL spectra of  $\text{Rb}_2\text{MnBr}_4 \cdot 2\text{H}_2\text{O}$  at room temperature.

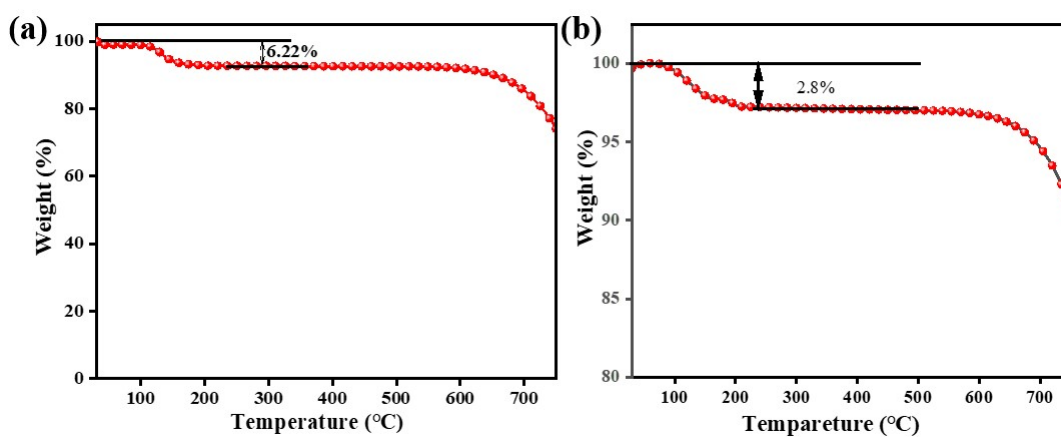

**Fig. S3** TGA curves of (a)  $\text{Rb}_2\text{MnBr}_4 \cdot 2\text{H}_2\text{O}$  and (b)  $\text{Rb}_2\text{MnBr}_4 \cdot 2\text{H}_2\text{O}$  after 160 °C treatment.

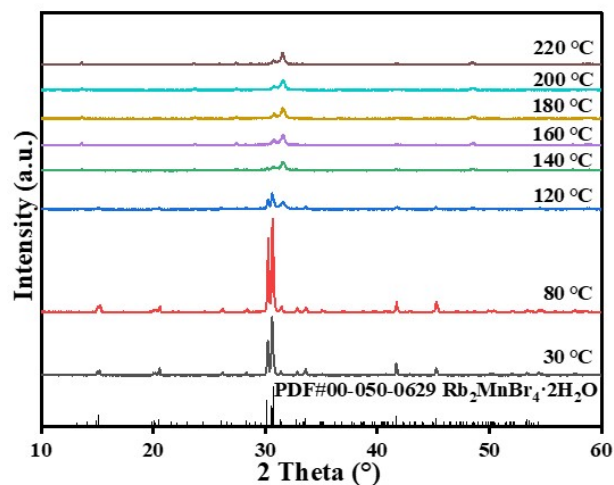

**Fig. S4** Temperature-dependent XRD patterns of  $\text{Rb}_2\text{MnBr}_4 \cdot 2\text{H}_2\text{O}$  crystals.

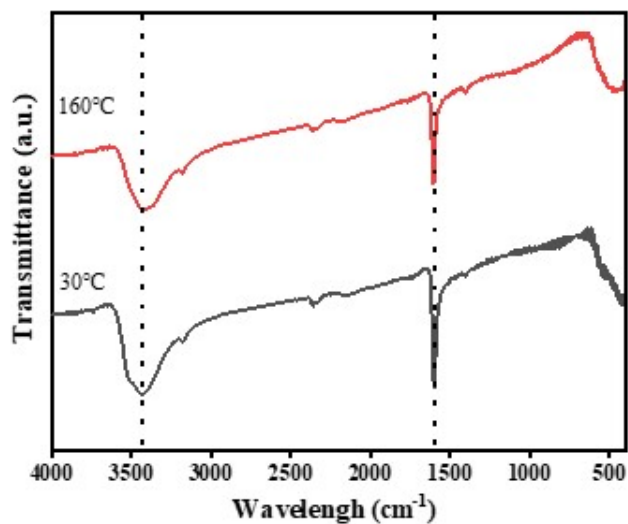

**Fig. S5** FT-IR spectra of  $\text{Rb}_2\text{MnBr}_4 \cdot 2\text{H}_2\text{O}$  crystals with different temperature.

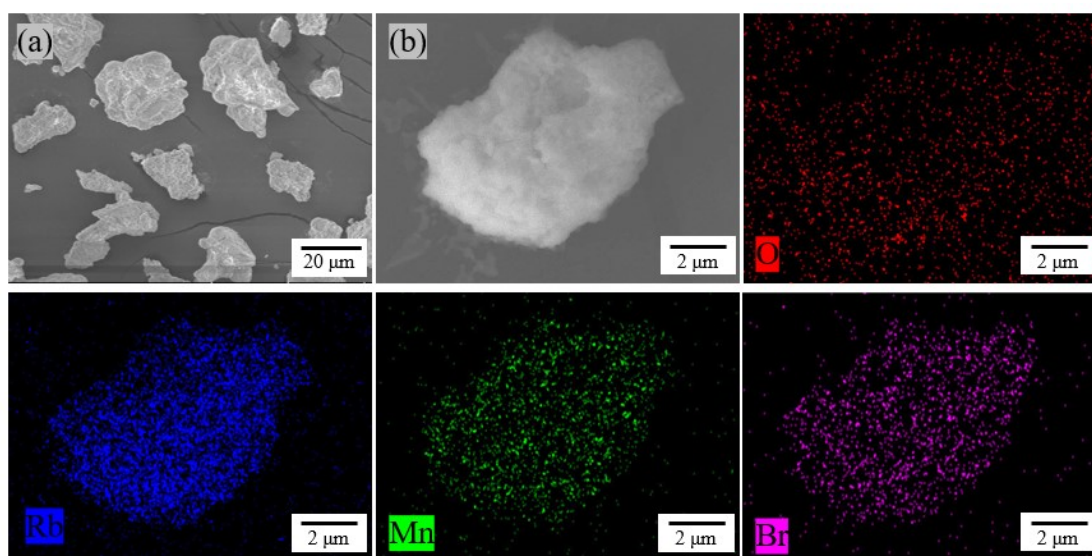

**Fig. S6** (a) SEM images and (b) EDS mapping of  $\text{Rb}_2\text{MnBr}_4 \cdot 2\text{H}_2\text{O}$  after heat treatment at 160 °C.

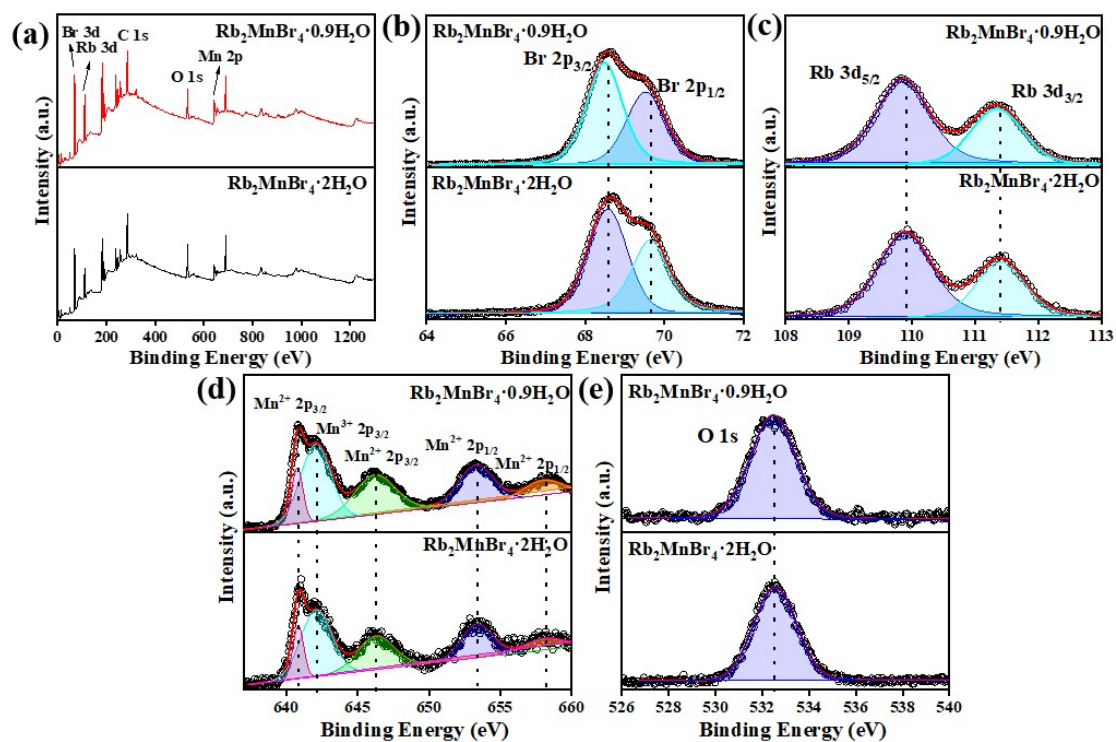

**Fig. S7** (a) XPS survey, high-resolution spectra of (b) Br 2p, (c) Rb 3d, (d) Mn 2p and (e) O 1s for  $\text{Rb}_2\text{MnBr}_4 \cdot 0.9 \text{H}_2\text{O}$  and  $\text{Rb}_2\text{MnBr}_4 \cdot 2\text{H}_2\text{O}$ .

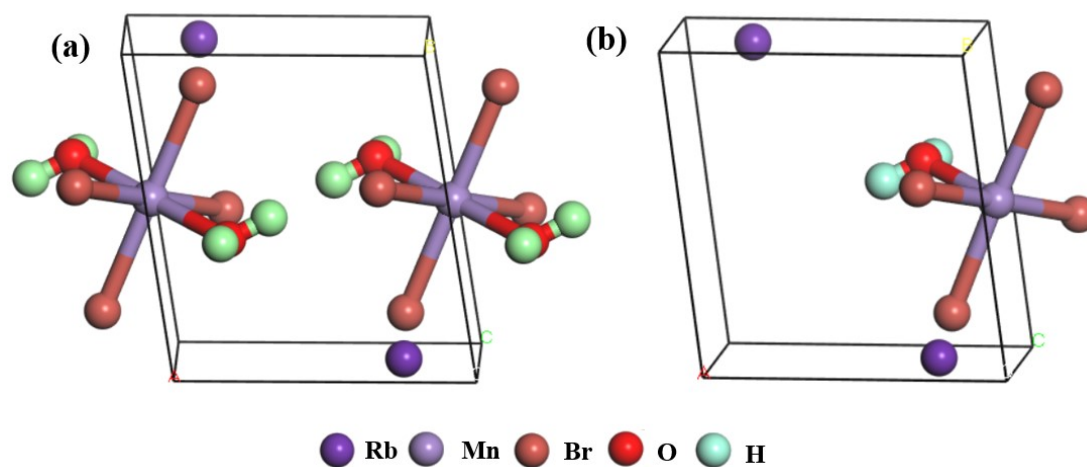

**Fig. S8** Optimized structures of (a)  $\text{Rb}_2\text{MnBr}_4 \cdot 2\text{H}_2\text{O}$  and (b)  $\text{Rb}_2\text{MnBr}_4 \cdot 1\text{H}_2\text{O}$ .

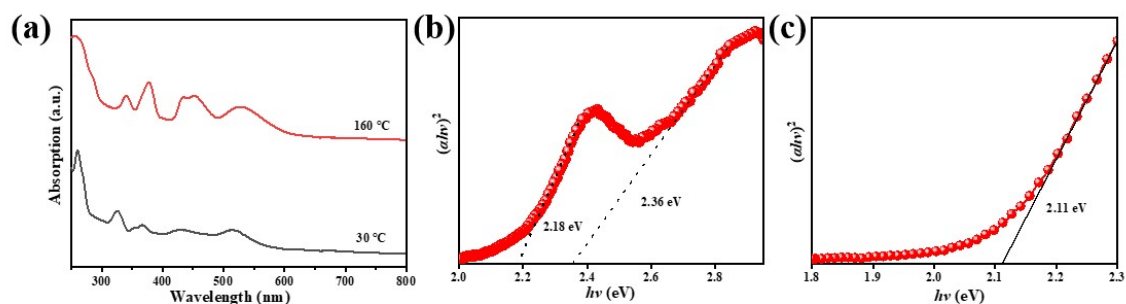

**Fig. S9** (a) Absorption spectra of  $\text{Rb}_2\text{MnBr}_4 \cdot 2\text{H}_2\text{O}$  after heat treatment at 30 °C and 160 °C, the fitted band gap of  $\text{Rb}_2\text{MnBr}_4 \cdot 2\text{H}_2\text{O}$  after heat treatment at (b) 30 °C and (c) 160 °C by the Tauc plot method.

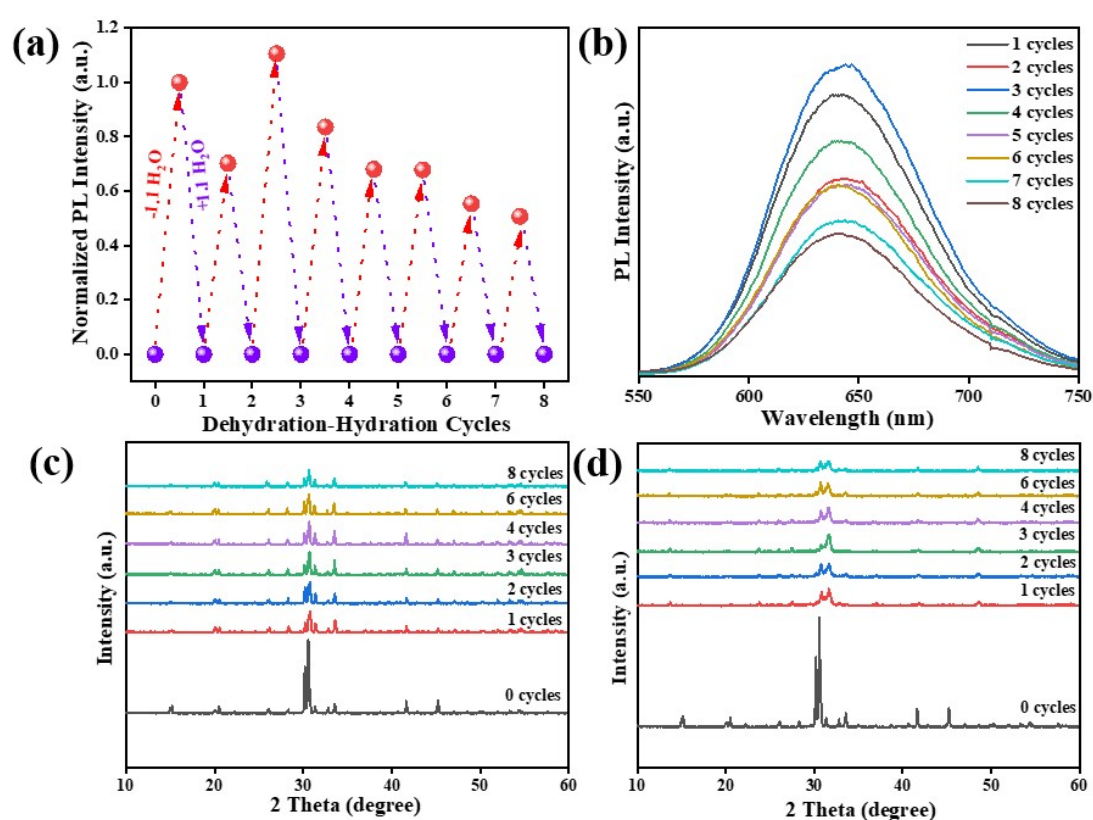

**Fig. S10** (a) Normalized PL intensity of  $\text{Rb}_2\text{MnBr}_4 \cdot 2\text{H}_2\text{O}$  in the dehydration-hydration cycles, (b) PL spectra of  $\text{Rb}_2\text{MnBr}_4 \cdot 2\text{H}_2\text{O}$  in dehydration cycles, XRD pattern of  $\text{Rb}_2\text{MnBr}_4 \cdot 2\text{H}_2\text{O}$  in (c) hydration cycles and (d) dehydration cycles.

The calculations of crystal field ( $\Delta$ ) are based on Tanabe-Sugano energy diagram of  $d^5$  electronic configurations, which can be obtained by the following equation (Eqs. (1)–(4)):

$$\Delta = 10D_q \quad (1)$$

$${}^6A_1({}^6S) \rightarrow [{}^4E({}^4G), {}^4A_1({}^4G)] = 10B + 5C + 20\alpha \quad (2)$$

$${}^6A_1({}^6S) \rightarrow {}^4E({}^4D) = 17B + 5C + 6\alpha \quad (3)$$

$${}^6A_1({}^6S) \rightarrow {}^4T_2({}^4D) = 13B + 5C + 8\alpha \quad (4)$$

$${}^6A_1({}^6S) \rightarrow {}^4T_2({}^4G) = -10D_q + 18B + 6C - (26B^2/10D_q) + 22\alpha \quad (5)$$

The  ${}^6A_1({}^6S) \rightarrow [{}^4E({}^4G), {}^4A_1({}^4G)]$ ,  ${}^6A_1({}^6S) \rightarrow {}^4E({}^4D)$ ,  ${}^6A_1({}^6S) \rightarrow {}^4T_2({}^4D)$  and  ${}^6A_1({}^6S) \rightarrow {}^4T_2({}^4G)$  can be obtained via converting the PLE into the diagram of energy coordinates.
